# Supplementary material for: A latent genetic subtype of major depression identified by whole-exome genotyping data in a Mexican-American cohort
Source: PubMed Central journal article supplement — Transl Psychiatry. 2017 May 16;7(5):e1134–. doi: 10.1038/tp.2017.102 (PMC5534938; doi:10.1038/tp.2017.102), 2017-05-16
Supplement: tp2017102x1.pdf [file tp2017102x1.pdf]

Table S1: The descriptive statistics for all 399 Mexican-American subjects (203 MDD cases and 196 controls) and the identified subgroup of 41 MDD cases.  $\mu$ : average value; SD: standard deviation; HAM-D: Hamilton depression rating scale; EL: educational level. For EL, the score 1 represents 0-5 years of education; the score 2 represents 6-8 years of education; the score 3 represents 9-12 years of education; the score 4 represents 1-2 years of college education; the score 5 represents 3 or more years of college education.

| Group                              | Status  | Gender | Age $\mu$ | Age SD | Number | HAM-D score $\mu$ | HAM-D score SD | EL score $\mu$ | EL score SD |
|------------------------------------|---------|--------|-----------|--------|--------|-------------------|----------------|----------------|-------------|
| All the 399 subjects               | Control | Male   | 39.34     | 13.49  | 80     | <i>N/A</i>        | <i>N/A</i>     | <i>N/A</i>     | <i>N/A</i>  |
|                                    |         | Female | 39.03     | 11.64  | 116    | <i>N/A</i>        | <i>N/A</i>     | <i>N/A</i>     | <i>N/A</i>  |
|                                    | MDD     | Male   | 40.96     | 10.78  | 70     | 23.15             | 3.66           | 2.82           | 1.31        |
|                                    |         | Female | 39.81     | 10.25  | 133    | 24.11             | 5.24           | 2.66           | 1.28        |
| Identified subgroup of 41 subjects | MDD     | Male   | 38.07     | 5.89   | 15     | 23.00             | 2.75           | 2.79           | 1.12        |
|                                    |         | Female | 39.38     | 12.05  | 26     | 24.70             | 5.08           | 2.22           | 1.09        |
